# Supplementary material for: First structural characterization of solvate-free silver dinitramide, Ag[N(NO2)2]
Source: Royal Society of Chemistry journal article supplement (doi:10.1039/b814447h), 2008-01-01
Supplement: b814447h.pdf [file b814447h.pdf]

## Electronic Supplementary Information

# First structural characterization of solvate-free silver dinitramide, $\text{Ag}[\text{N}(\text{NO}_2)_2]$

Thomas M. Klapötke,\* Burkhard Krumm and Matthias Scherr

Raman spectrum of AgDN:

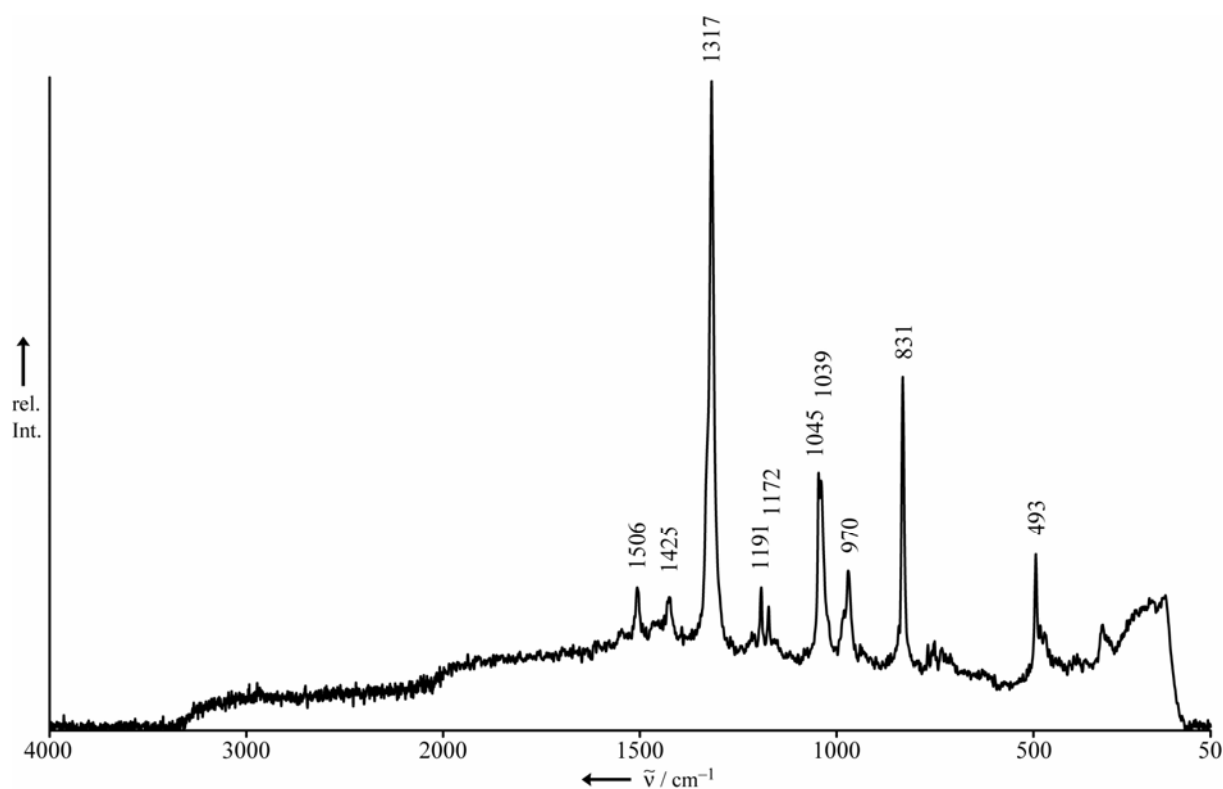

## Details for sensitivity tests:

For initial safety testing, the impact and friction sensitivities as well as the electrostatic sensitivity were determined.<sup>1</sup> The impact sensitivity tests were carried out according to STANAG 4489<sup>2</sup> modified according to instruction<sup>3</sup> using a BAM (Bundesanstalt für Materialforschung)<sup>4</sup> drophammer.<sup>5</sup> The friction sensitivity tests were carried out according to STANAG 4487<sup>6</sup> modified according to instruction<sup>7</sup> using the BAM friction tester. Compounds are classified according to the “UN Recommendations on the transport of dangerous goods”.<sup>8</sup> The electrostatic sensitivity tests were carried out using an electric spark tester ESD 2010EN (OZM Research) operating with the “Winspark 1.15 software package”.<sup>9</sup>

## References

1. M. Suceška, *Test Methods for Explosives*, Springer, New York 1995, p. 21 (impact), p. 27 (friction).
2. *NATO standardization agreement (STANAG) on explosives, impact sensitivity tests, no. 4489*, Ed. 1, Sept. 17, 1999.
3. *WIWEB-Standardarbeitsanweisung 4-5.1.02, Ermittlung der Explosionsgefährlichkeit, hier der Schlagempfindlichkeit mit dem Fallhammer*, Nov. 8, 2002.
4. <http://www.bam.de>
5. <http://www.reichel-partner.de/>
6. *NATO standardization agreement (STANAG) on explosive, friction sensitivity tests, no. 4487*, Ed. 1, Aug. 22, 2002.
7. *WIWEB-Standardarbeitsanweisung 4-5.1.03, Ermittlung der Explosionsgefährlichkeit oder der Reibeempfindlichkeit mit dem Reibeapparat*, Nov. 8, 2002.
8. Impact: Insensitive > 40 J, less sensitive  $\geq 35$  J, sensitive  $\geq 4$  J, very sensitive  $\leq 3$  J. Friction: Insensitive > 360 N, less sensitive = 360 N, sensitive < 360 N and > 80 N, very sensitive  $\leq 80$  N, extremely sensitive  $\leq 10$  N. According to the *UN Recommendations on the Transport of Dangerous Goods*.
9. <http://www.ozm.cz/testing-instruments/small-scale-electrostaticdischarge-tester.htm>

### Details for DSC measurements:

For determining the decomposition temperature, a LINSEIS DSC PT 10<sup>10</sup> with a heating rate of 5 °C min<sup>-1</sup> and a nitrogen flow of 5 L h<sup>-1</sup> was used. The measurement with ca. 2.5 mg of AgDN was performed in a pressed Al-container containing a hole (0.1 mm) for the gas release.

AgDN does not melt and decomposes at 120 °C.

10. <http://www.linseis.com/>
